# Supplementary material for: Top2a promotes the development of social behavior via PRC2 and H3K27me3
Source: bioRxiv or medRxiv preprint supplement (doi:10.1101/2021.09.20.461107), 2021-10-21
Supplement: Supplementary file [file media-3.pdf]

## Supplementary Materials for

### **Top2a promotes the development of social behavior via PRC2 and H3K27me3**

Yijie Geng, Tejia Zhang, Sean C. Godar, Brock R. Pluimer, Devin L. Harrison, Anjali K. Nath, Jing-Ruey Joanna Yeh, Iain A. Drummond, Marco Bortolato, Randall T. Peterson\*

\*Corresponding author. Email: [randall.peterson@pharm.utah.edu](mailto:randall.peterson@pharm.utah.edu)

#### **This PDF file includes:**

Figs. S1 to S11  
Movies S1  
Data S1

#### **Other Supplementary Materials for this manuscript include the following:**

Movies S1  
Data S1

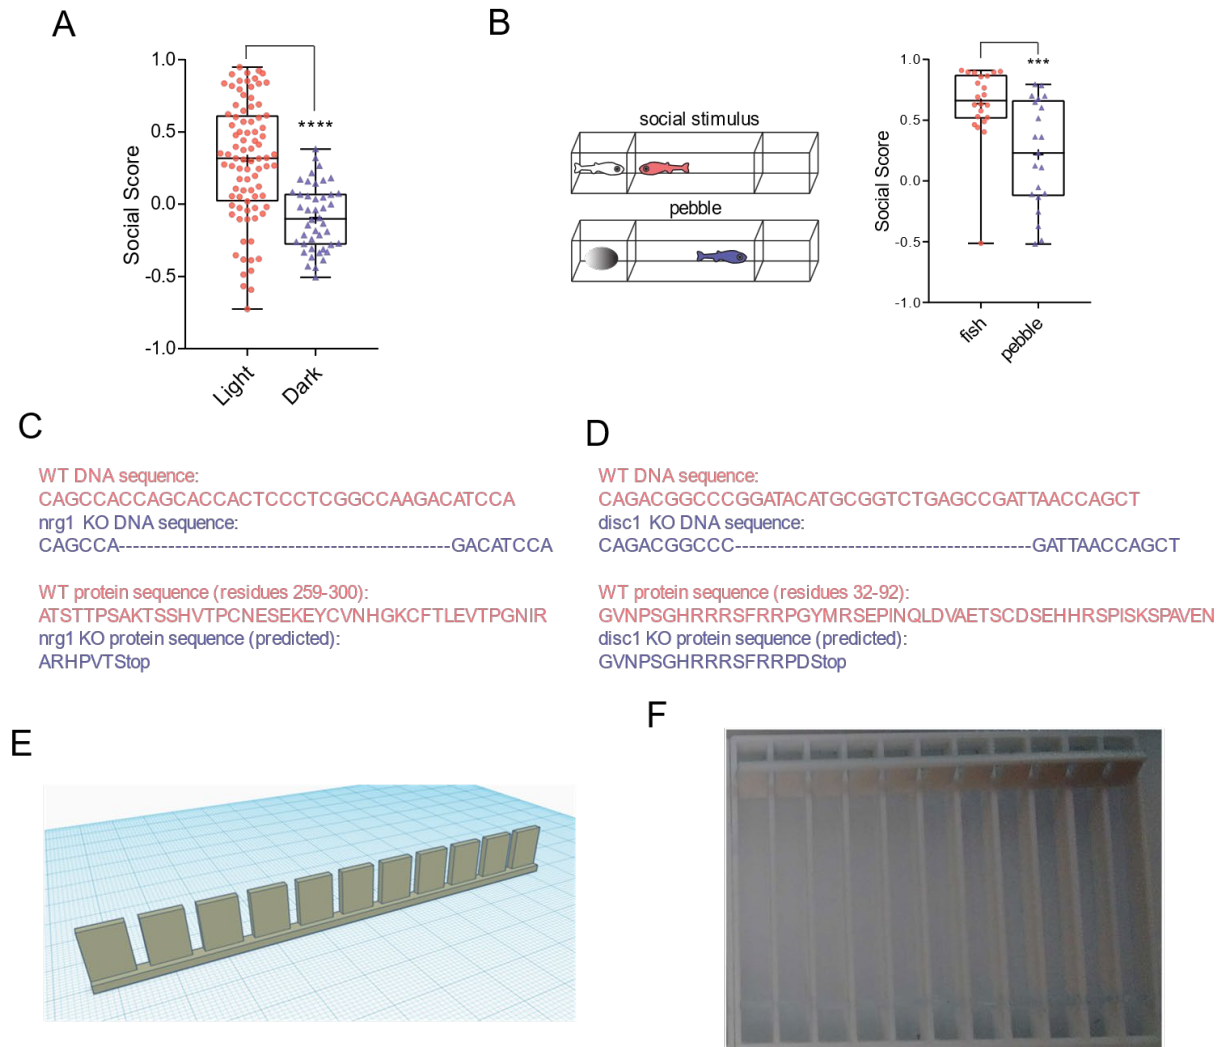

**Figure S1.** (A) Boxplot comparing social scores of WT fish in light ( $n = 87$ ) or dark ( $n = 44$ ). \*\*\*\*:  $p < 0.0001$ . (B) Boxplot comparing social scores of WT fish in response to a social stimulus (fish;  $n = 22$ ) or pebble ( $n = 21$ ). \*\*\*:  $p < 0.001$ . (C) DNA and protein sequences of WT and *nrg1* knockout fish. (D) DNA and protein sequences of WT and *disc1* knockout fish. (E) 3D printing design for the view-blocking comb. (F) Image of a comb placed on a Fishbook test arena. The comb is not inserted in this image.

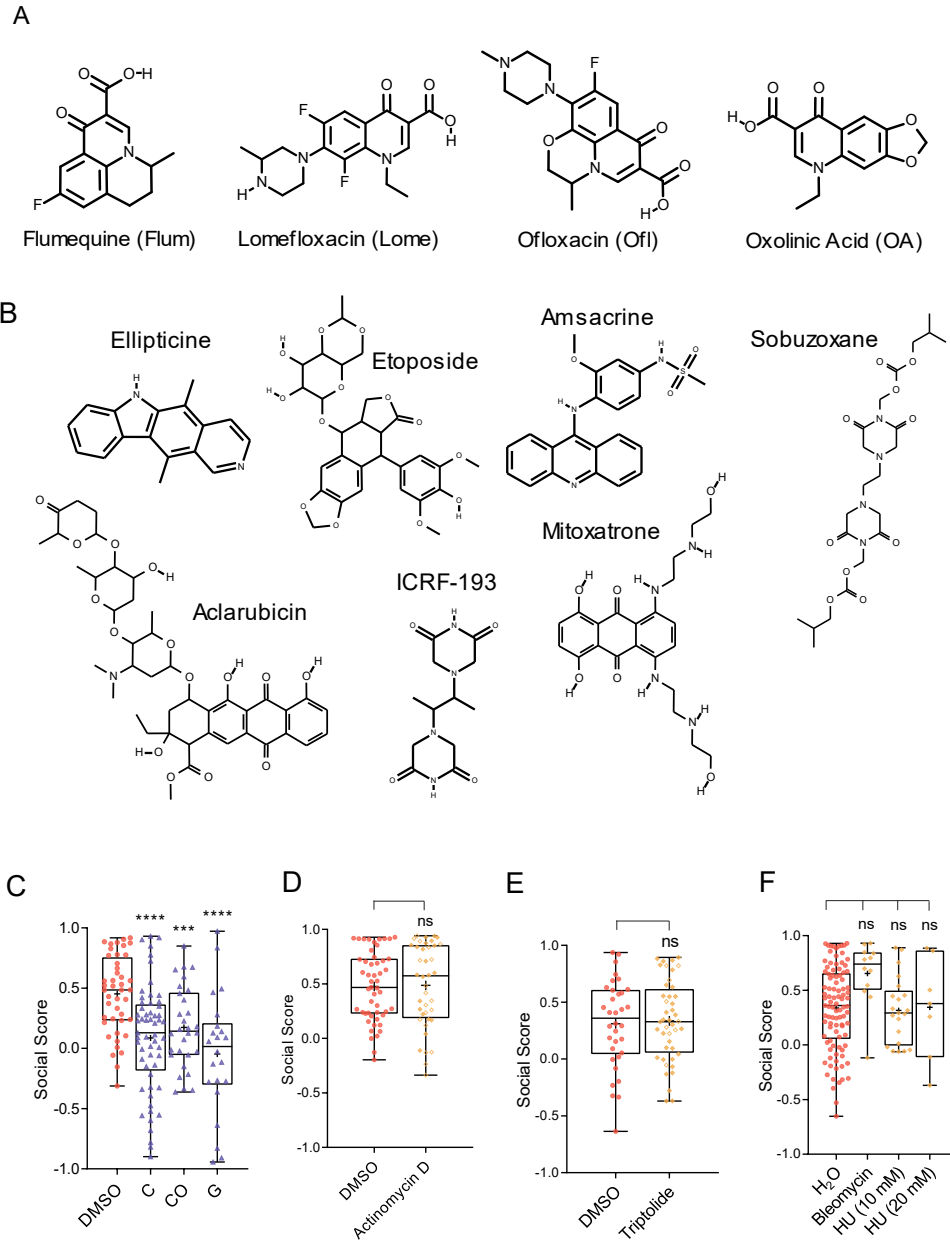

**Figure S2.** (A) Chemical structures of fluoroquinolones. (B) Chemical structures of eukaryotic Top2 inhibitors. (C) Boxplot showing social scores of fish treated with DMSO (n=44), chlorpyrifos (C; 5  $\mu$ M; n=57), chlorpyrifos oxon (CO; 1  $\mu$ M; n=30), and genistein (G; 8  $\mu$ M; n=22). (D) Boxplot comparing social scores of fish treated with DMSO (n = 51) or actinomycin D (20  $\mu$ M; n = 40). (E) Boxplot comparing social scores of fish treated with DMSO (n = 34) or triptolide (0.2  $\mu$ M; n = 44). (F) Boxplot comparing social scores of fish treated with DMSO (n = 97), bleomycin (1  $\mu$ M; n = 12), or hydroxyurea (HU; 10 mM, n = 21; 20 mM, n = 7). ns: not significant, \*\*\*:  $p < 0.001$ , \*\*\*\*:  $p < 0.0001$ .

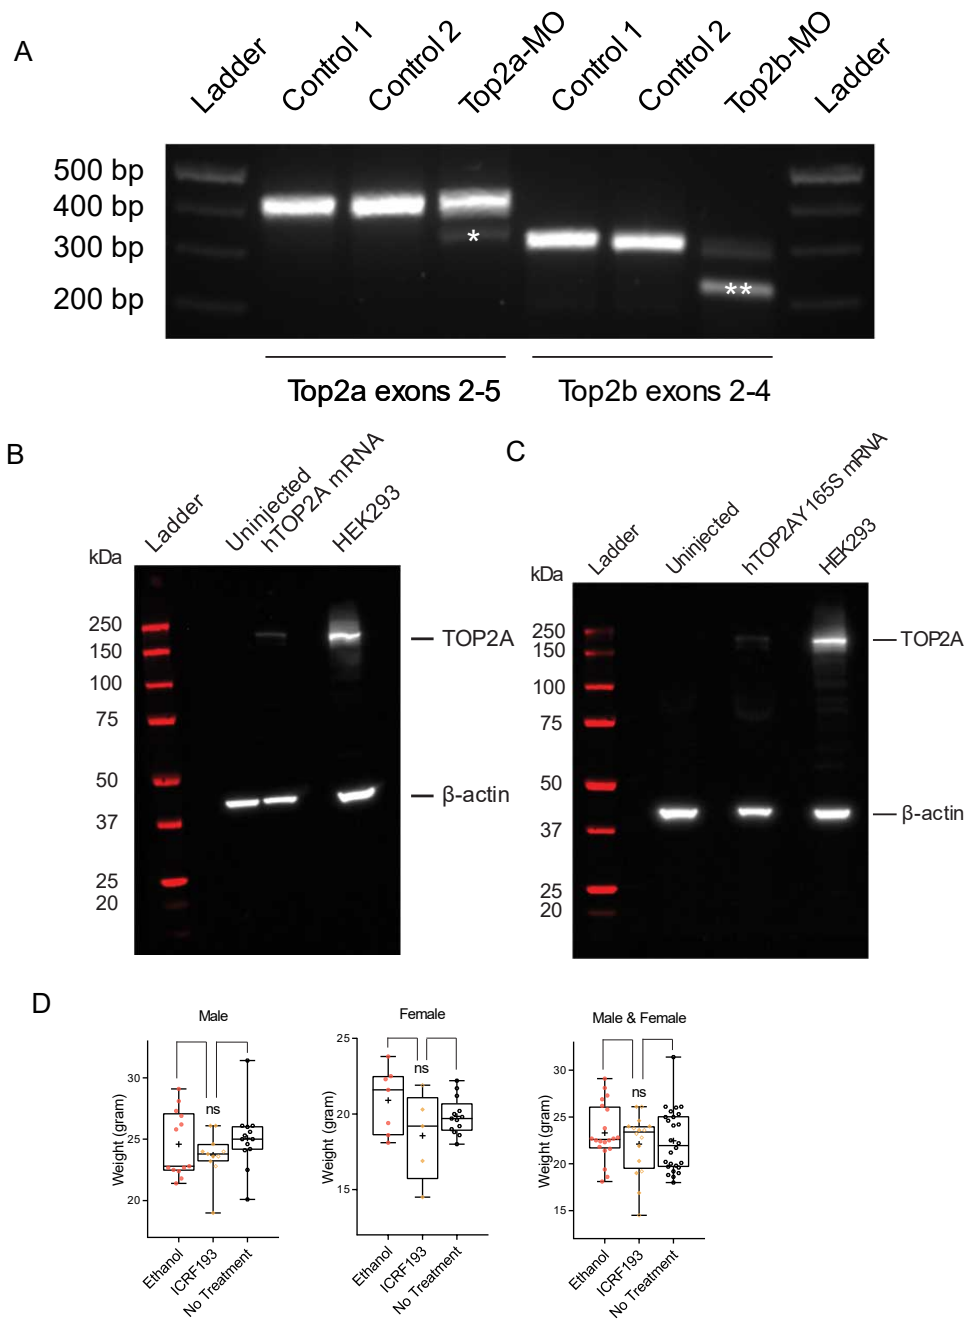

**Figure S3.** (A) DNA gel image showing RT-PCR result of 1 dpf embryos injected with Top2a-MO (0.05 mM), Top2b-MO (0.05 mM), or un-injected (Controls 1 & 2).  $n \sim 80 - 100$  embryos for each condition. \*: splice-blocked amplicon of Top2a. \*\*: splice-blocked amplicon of Top2b. (B, C) Western blot images showing protein overexpression following injection of 250 ng/ $\mu$ l *hTOP2A* (B) and *hTOP2AY165S* (C) mRNAs in zebrafish embryos. HEK293 cell lysate was used as positive controls. Uninjected zebrafish embryos were used as negative controls.  $\beta$ -actin was used as a loading control. (D) Boxplot comparing the body weights of mice treated with ethanol (male:  $n = 13$ , female:  $n = 7$ ), ICRF193 (male:  $n = 11$ , female:  $n = 5$ ), and no-treatment control (male:  $n = 13$ , female:  $n = 13$ ) at 2 months of age. ns: not significant.

A

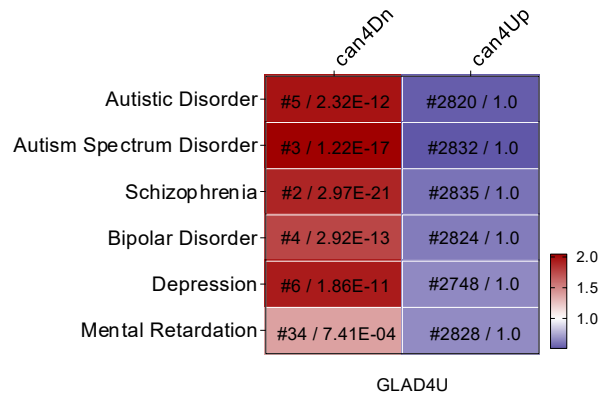

B

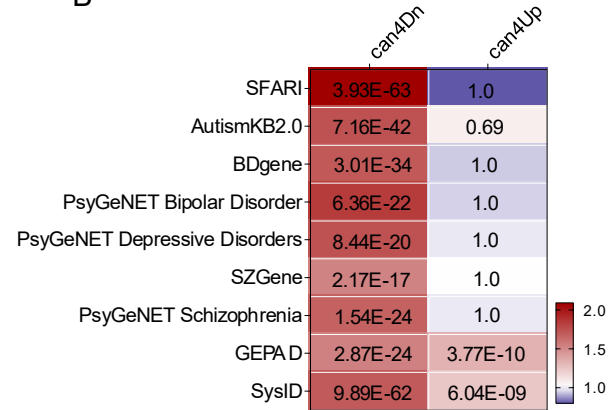

C

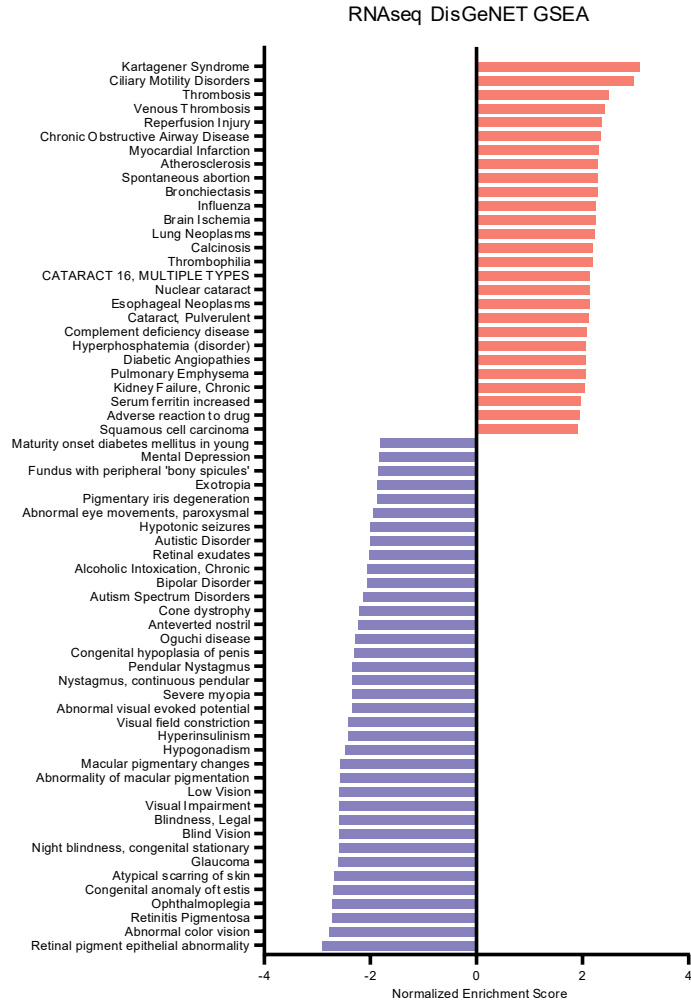

**Figure S4.** (A) can4Dn but not can4Up is selectively enriched for autism and its comorbidities risk gene sets from the GLAD4U library. For each cell, color represents odds ratio, and numbers represent ranking out of 3071 diseases in GLAD4U library (before slash) and adjusted *p*-value

(after slash). **(B)** Heatmap showing ORA analysis comparing can4Dn and can4Up using several independent disease risk gene sets related to autism and its comorbid disorders. Color in each cell represents odds ratio values. Number in each cell represents adjusted  $p$ -value. **(C)** Bar chart showing normalized enrichment scores from GSEA analysis for RNA-seq data using the DisGeNET library.

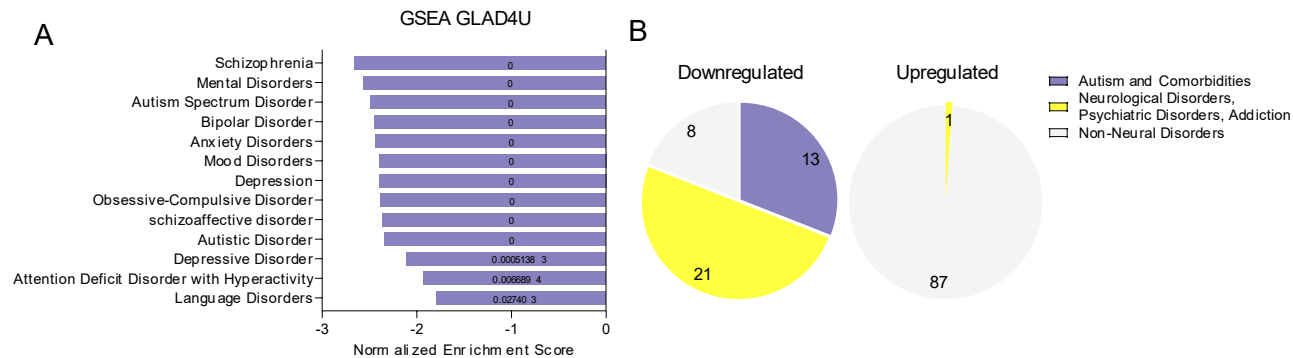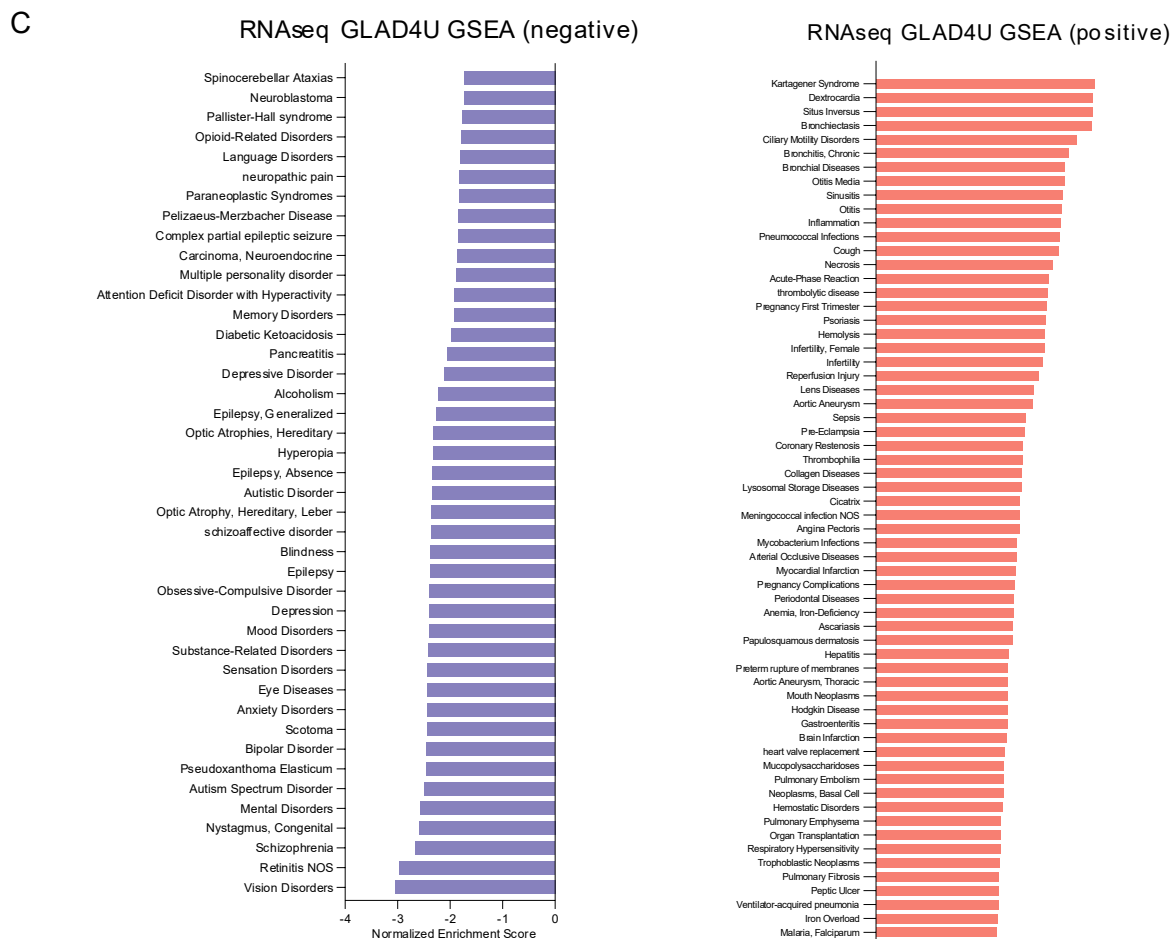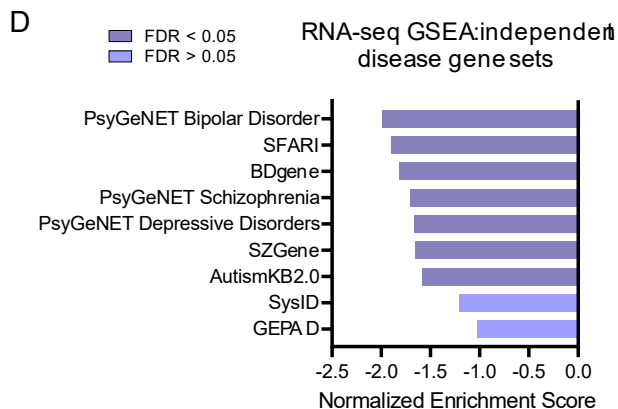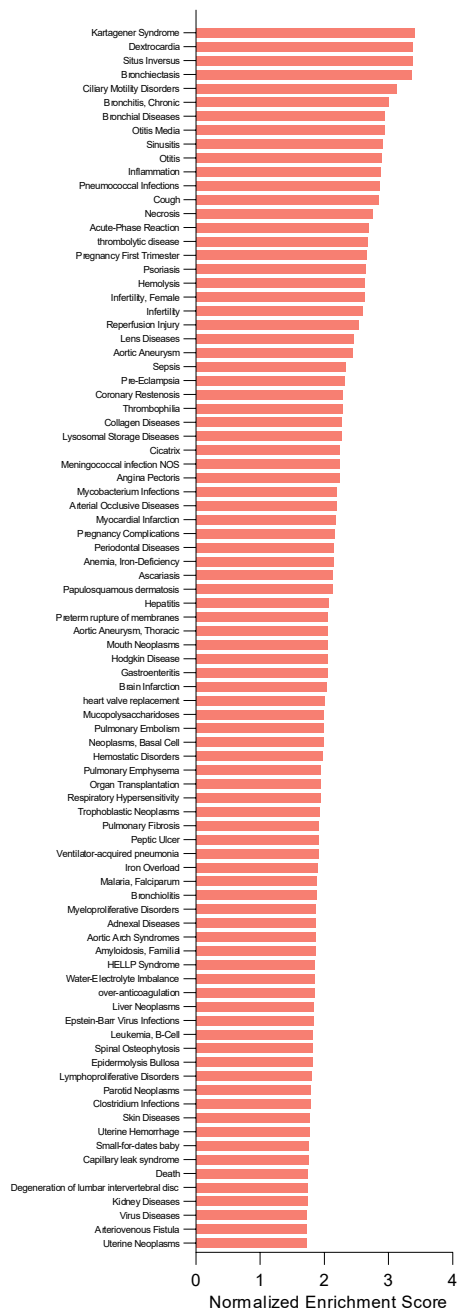

**Figure S5.** (A, B) GSEA analysis of RNA-seq data using the GLAD4U library shows enrichment for autism and its comorbidities risk genes (A & B) and neurological conditions risk genes (B) in downregulated but not upregulated genes. Value inside each bar represents FDR (A). Significance: FDR<5%. (C) Bar charts showing normalized enrichment scores (NESs) from GSEA analysis for RNA-seq data using the GLAD4U library. Left: hits with positive NESs; right: hits with negative NESs. (D) Bar chart showing normalized enrichment scores from GSEA analysis for RNA-seq data using several independent disease gene sets related to autism and its comorbid disorders. Significance: FDR < 5%.



**A**

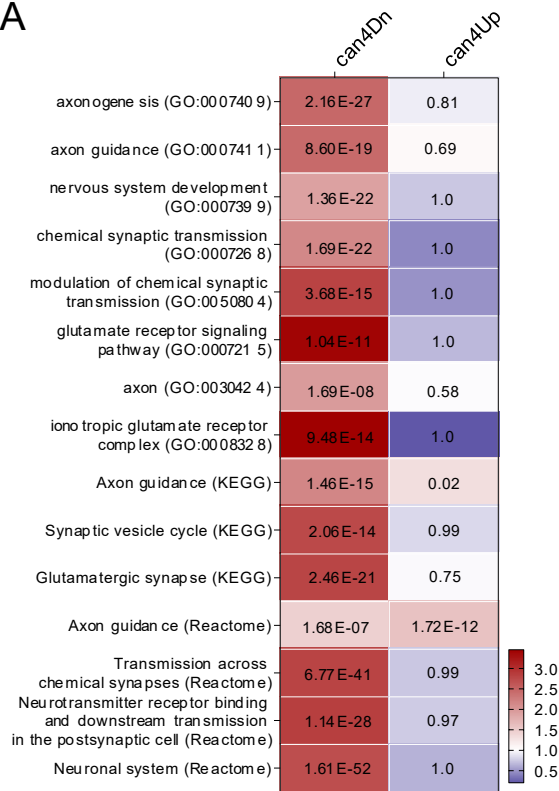

**B**

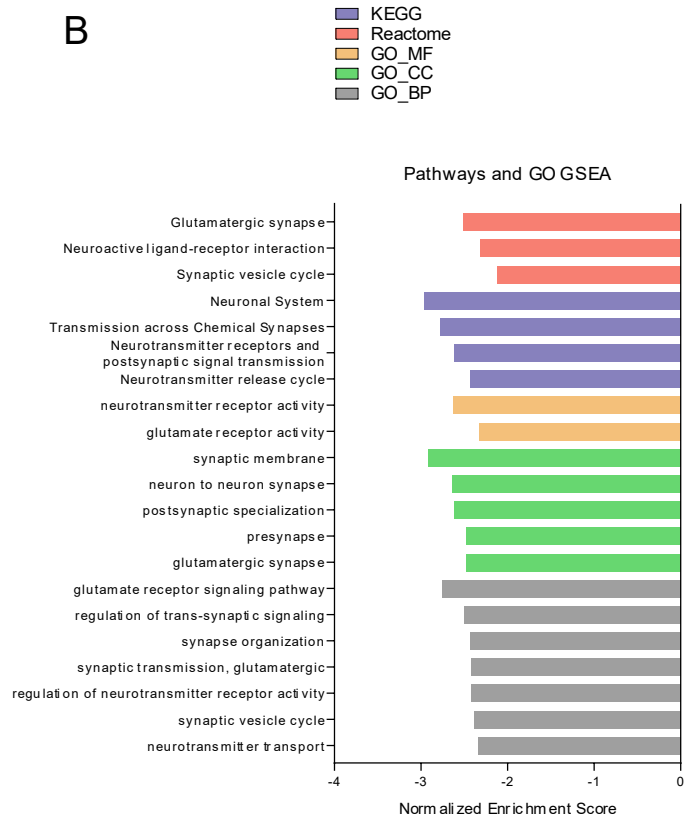

**Figure S6. (A)** Heatmap showing ORA analysis comparing can4Dn and can4Up using KEGG, REACTOME, and GO libraries. Color in each cell represents odds ratio. **(B)** Bar chart showing GSEA analysis of KEGG, Reactome, and GO libraries using the RNA-seq data.

A

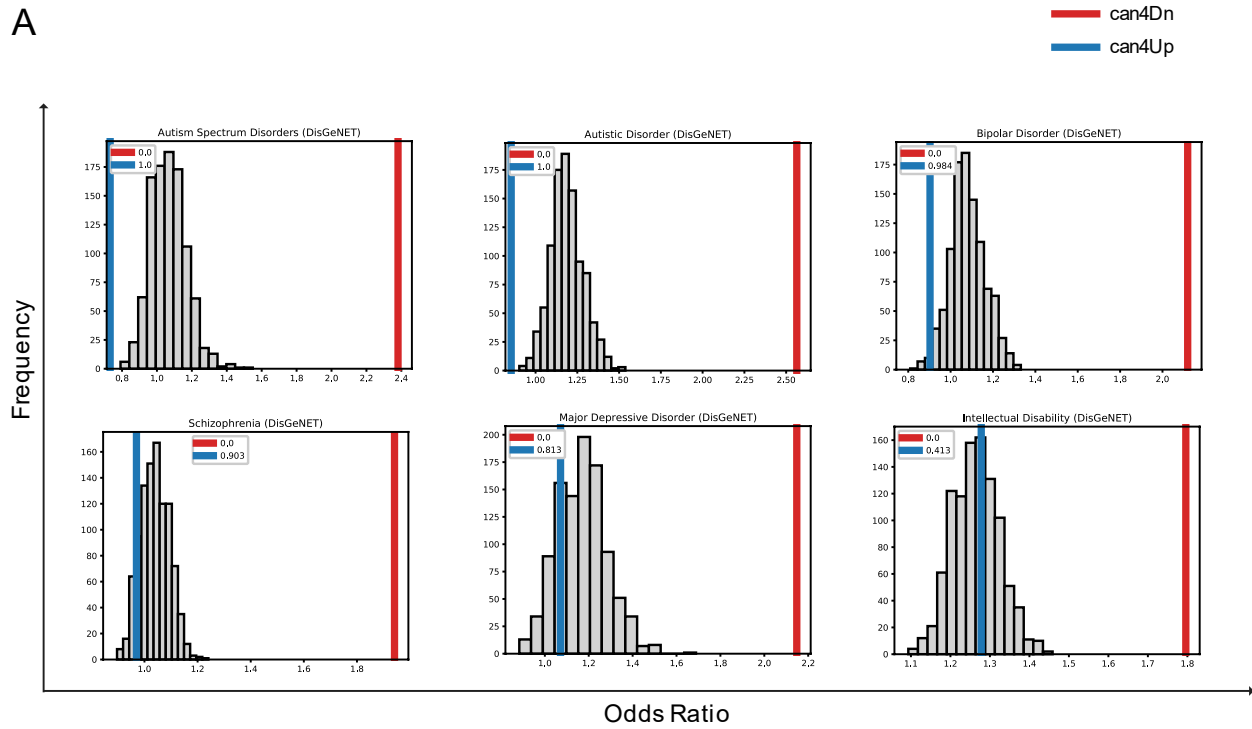

B

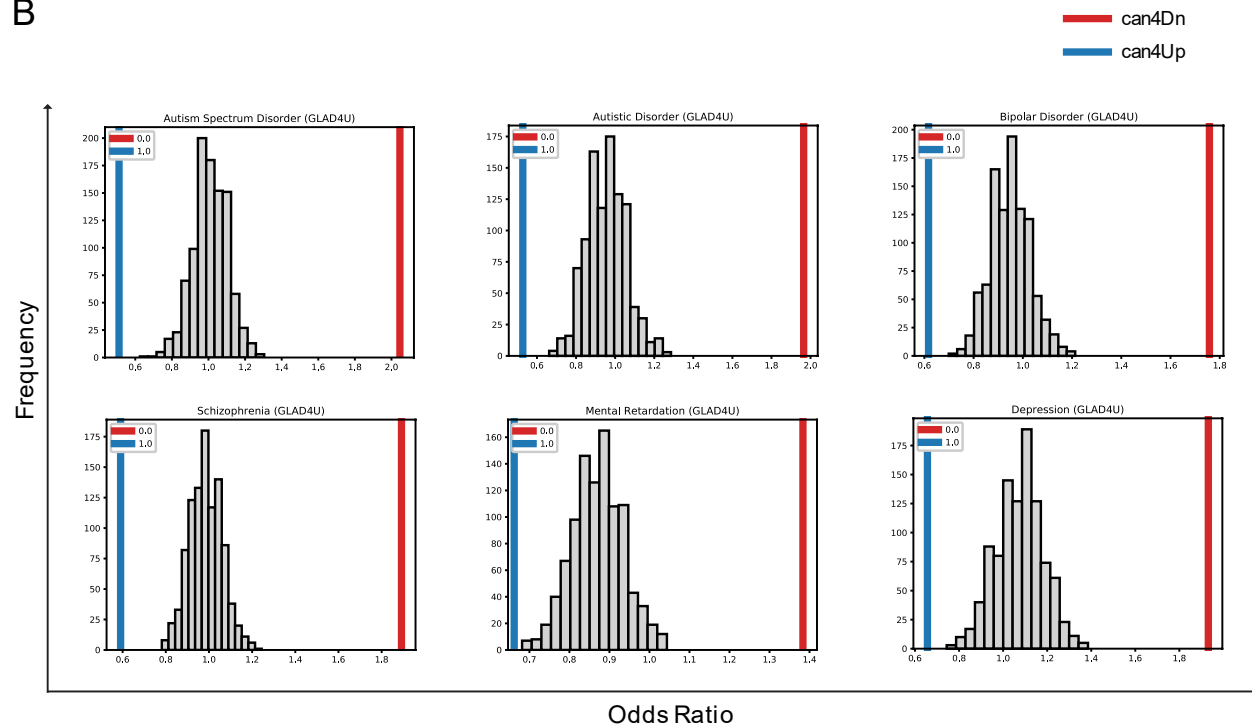

**Figure S7.** (A) Histogram showing the null distribution of odds ratios generated by 1000 permutations by randomly selecting 5000 genes out of all human orthologs of zebrafish genes and conduct ORA analysis using selected gene sets from the DisGeNET library. The odds ratios for can4Dn (red) and can4Up (blue) are marked by colored vertical lines, and their respective *p*-values are shown as numbers in legends. A *p*-value <0.008 was considered significant to correct

for multiple comparisons. **(B)** Histogram showing the null distribution of odds ratios generated by 1000 permutations by randomly selecting 5000 genes out of all human orthologs of zebrafish genes and conduct ORA analysis using selected gene sets from the GLAD4U library. The odds ratios for can4Dn (red) and can4Up (blue) are marked by colored vertical lines, and their respective  $p$ -values are shown as numbers in legends. A  $p$ -value  $<0.008$  was considered significant to correct for multiple comparisons.

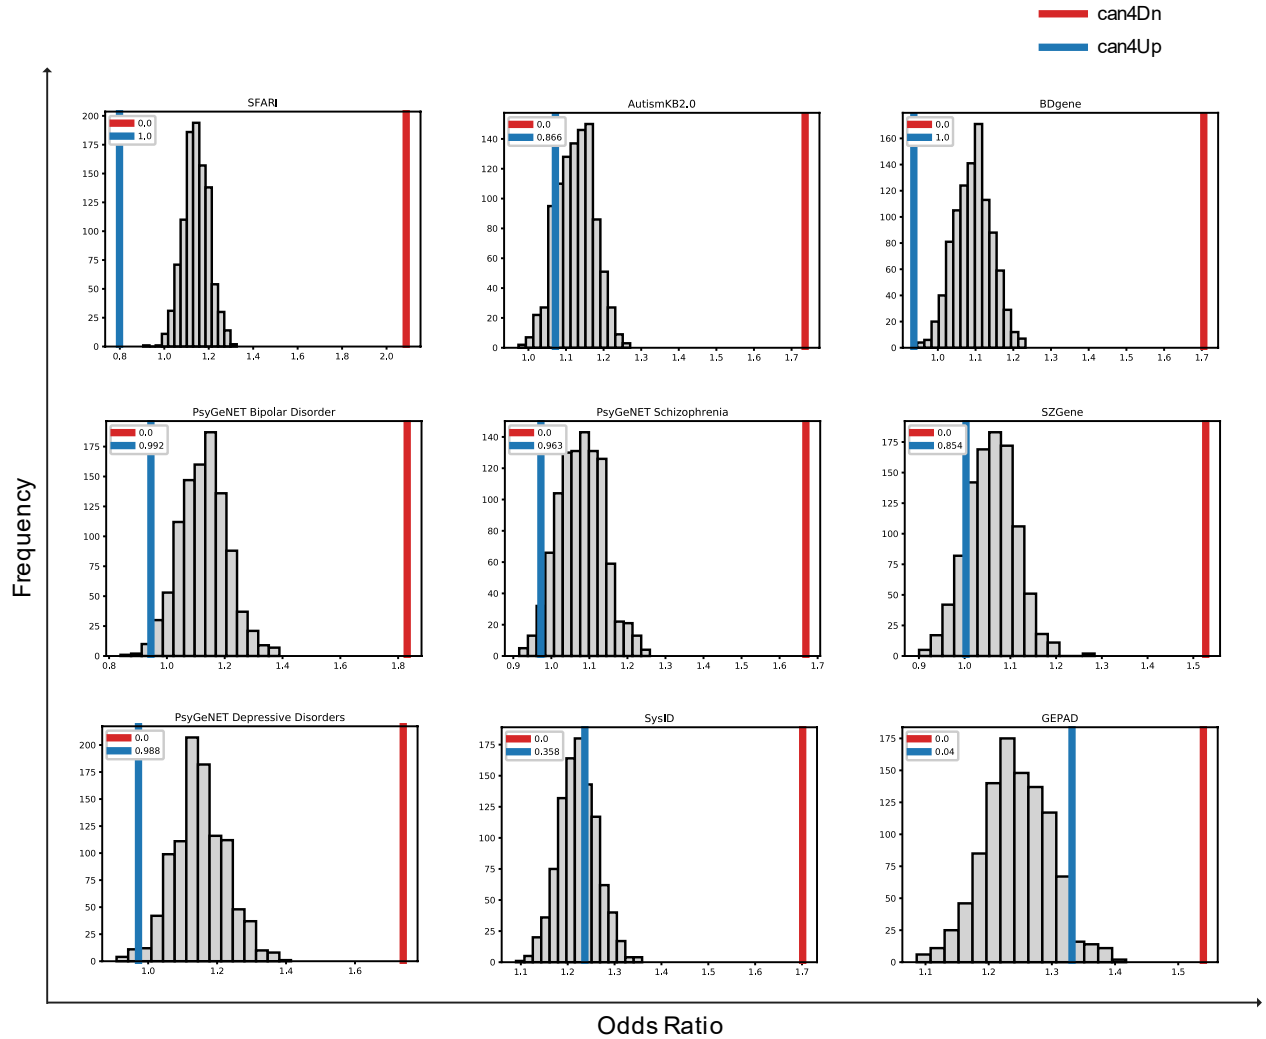

**Figure S8.** Histogram showing the null distribution of odds ratios generated by 1000 permutations by randomly selecting 5000 genes out of all human orthologs of zebrafish genes and conduct ORA analysis using selected gene sets from several independent disease gene sets related to autism and its comorbid conditions. The odds ratios for can4Dn (red) and can4Up (blue) are marked by colored vertical lines, and their respective  $p$ -values are shown as numbers in legends. A  $p$ -value  $< 0.005$  was considered significant to correct for multiple comparisons.

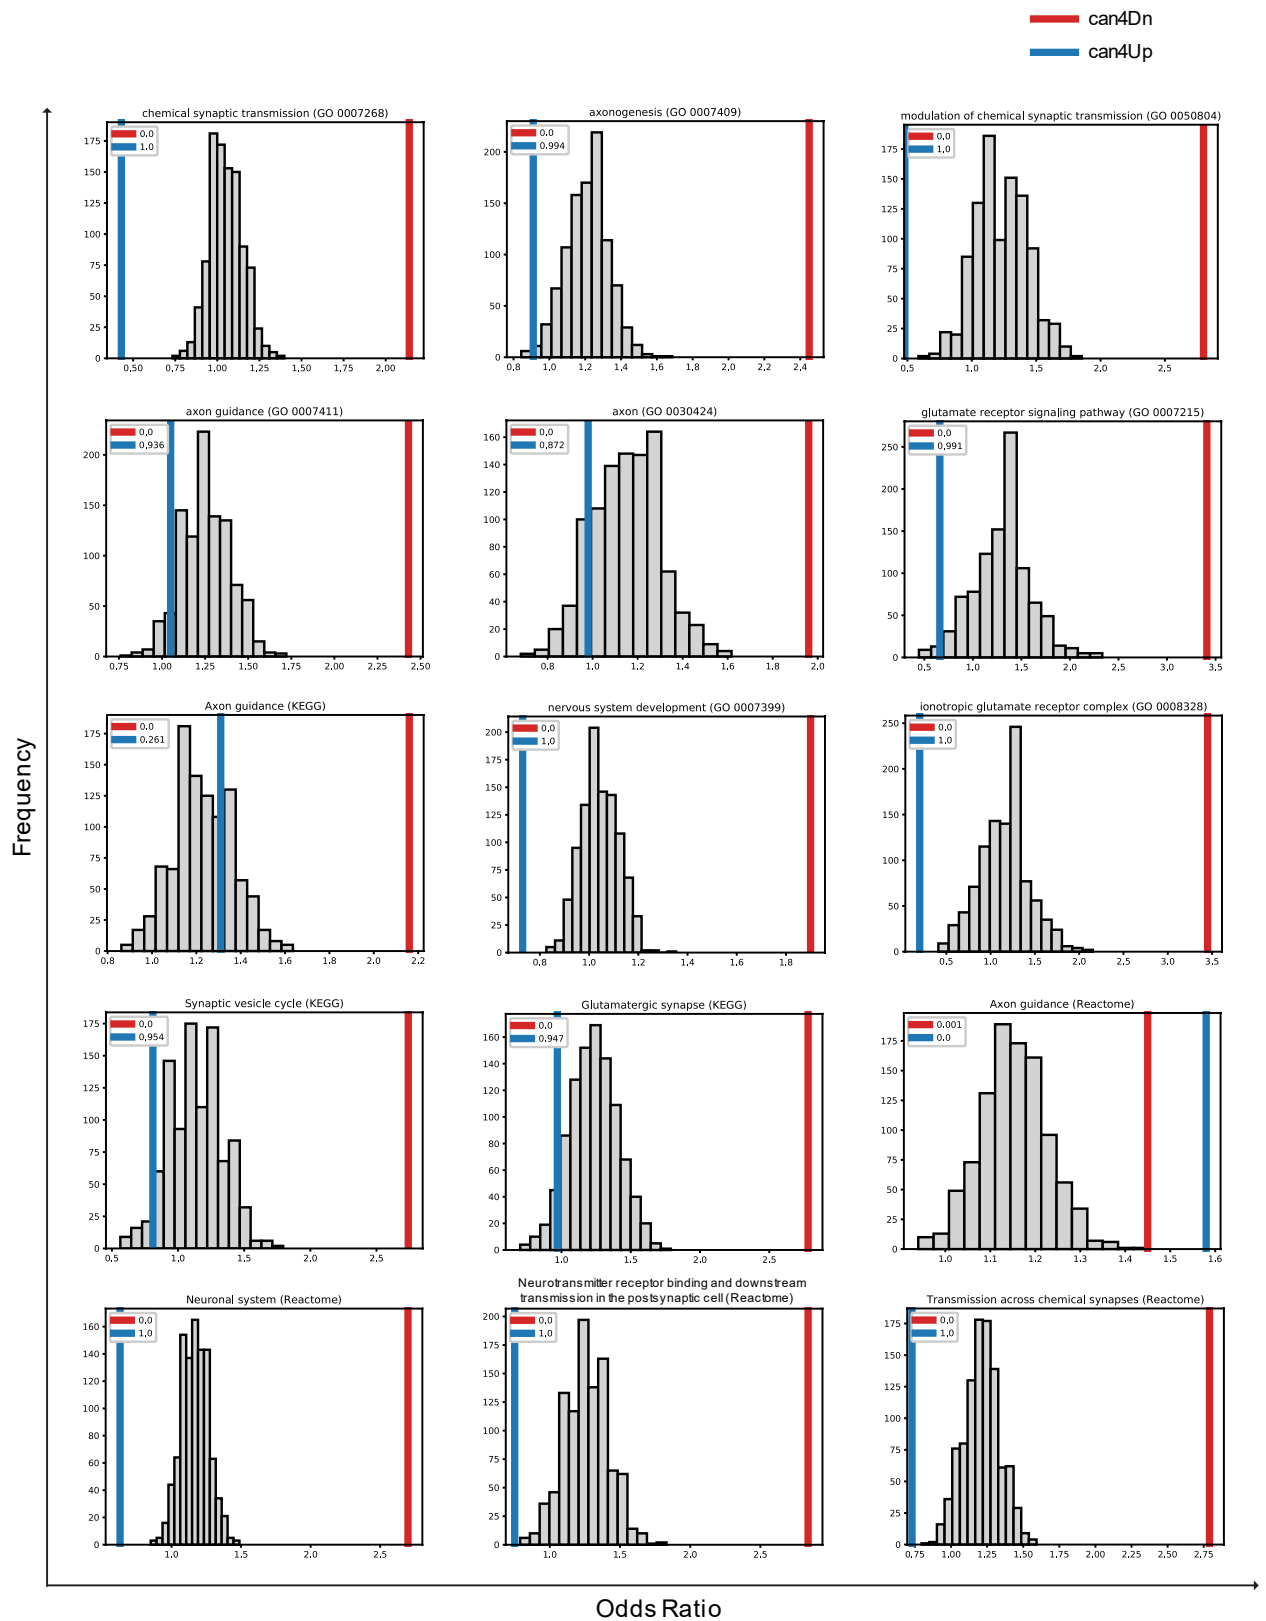

**Figure S9.** Histogram showing the null distribution of odds ratios generated by 1000 permutations by randomly selecting 5000 genes out of all human orthologs of zebrafish genes

and conduct ORA analysis using selected gene sets from KEGG, Reactome, and GO libraries. The odds ratios for can4Dn (red) and can4Up (blue) are marked by colored vertical lines, and their respective  $p$ -values are shown as numbers in legends. A  $p$ -value  $<0.003$  was considered significant to correct for multiple comparisons.

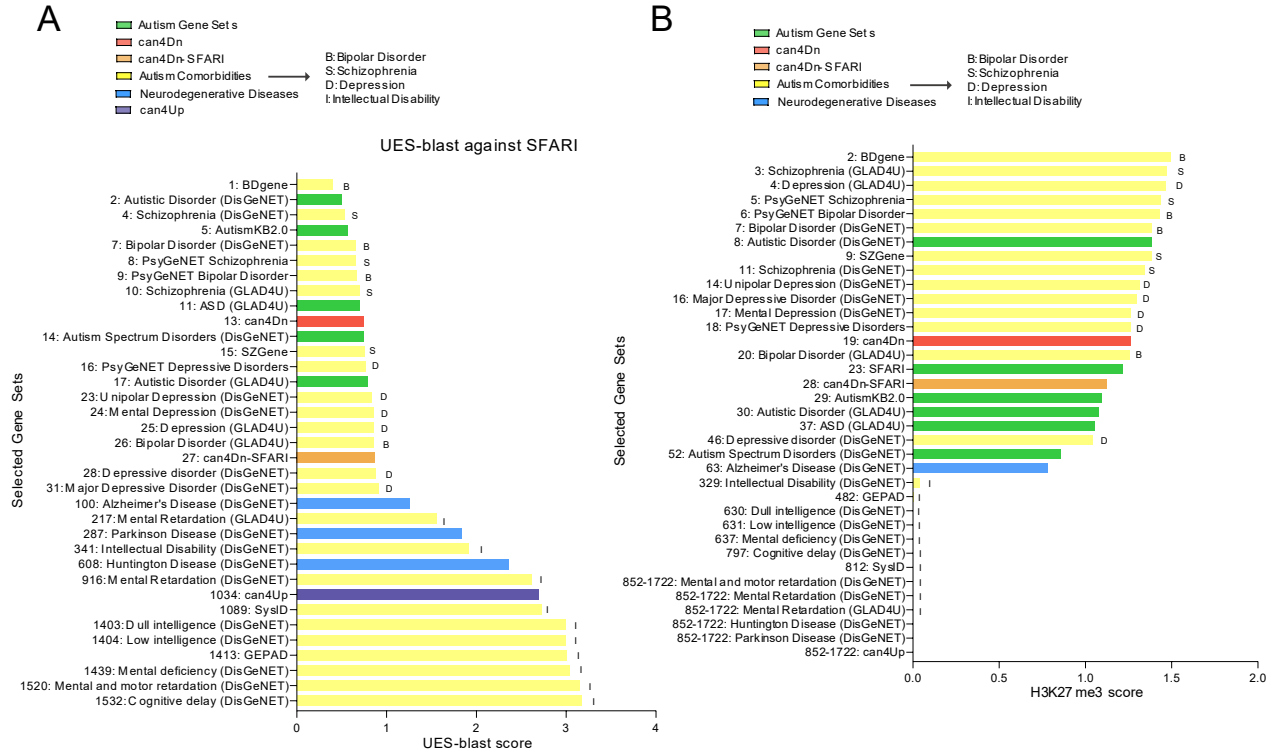

**Figure S10.** (A) A detailed look at UES-blast rankings of the key gene sets in Figure 6C. Bar chart shows the UES-blast scores of autism risk gene sets (green), can4Dn (red), can4Dn-SFARI (orange), autism comorbid conditions risk gene sets (yellow; D: depression, B: dipolar disorder, S: schizophrenia, I: intellectual disability), can4Up (dark blue), and neurodegenerative disorders risk gene sets (blue). Numbers in the x-axis labels before gene set names represent the UES-blast rankings of each labeled gene set. (B) A detailed look at H3K27me3 score rankings of the key gene sets in Figure 6F. Bar chart shows the H3K27me3 scores of autism risk gene sets (green), can4Dn (red), can4Dn-SFARI (orange), autism comorbid conditions risk gene sets (yellow; D: depression, B: dipolar disorder, S: schizophrenia, I: intellectual disability), can4Up (dark blue), and neurodegenerative disorders risk gene sets (blue). Numbers in the x-axis labels before gene set names represent the H3K27me3 score rankings of each labeled gene set.

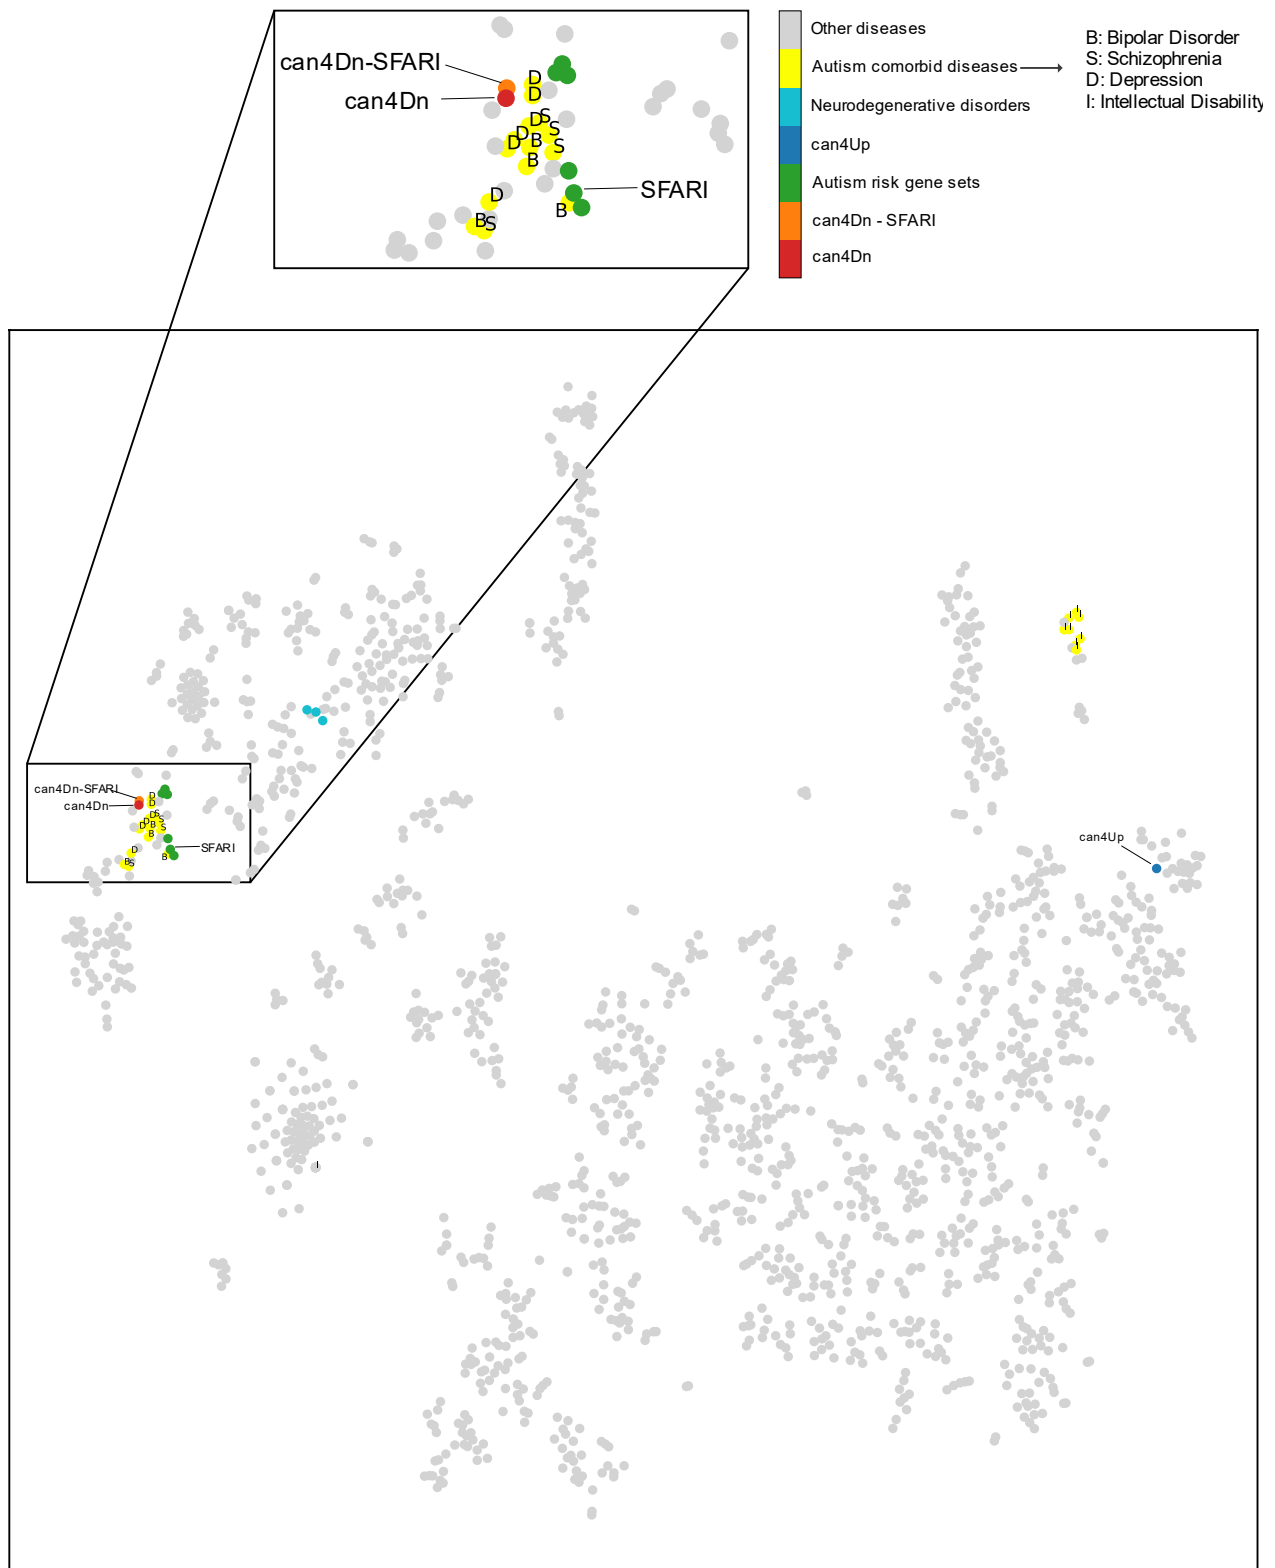

**Figure S11.** tSNE clustering of can4Dn, can4Dn-SFARI, autism risk gene sets, neurodegenerative disorders risk gene sets, and all control gene sets from the reference dataset. Letters label autism comorbidities risk gene sets, I: intellectual disability; D: depression; S: schizophrenia; B: bipolar disorder.



**Movies S1.**

Video recording of a Fishbook test. Played at 4× the actual speed.

**Data S1.**

The can4Dn and can4Up gene lists.
